# Supplementary material for: Solution NMR structural study of a mixed aggregate of N-lithium triphenylphosphazene and lithium bromide
Source: Royal Society of Chemistry journal article supplement (doi:10.1039/b821424g), 2009-01-01
Supplement: b821424g.pdf [file b821424g.pdf]

# Solution NMR Structural Study of a Mixed Aggregate of *N*-Lithium Triphenylphosphazene and Lithium Bromide

Ignacio Fernández,<sup>a</sup> Matthew G. Davidson,<sup>b</sup> Richard D. Price<sup>b</sup> and Fernando López Ortiz<sup>a</sup>

<sup>a</sup> Área de Química Orgánica, Universidad de Almería, 04120, Almería, España. Fax: +34 950015481; Tel: +34 950015478; E-mail: flortiz@ual.es

<sup>b</sup> Department of Chemistry, University of Bath, Claverton Down, BA2 7AY, UK.

Contents:

Figure S1. <sup>1</sup>H NMR spectra in the whole range of temperatures assayed (298 K-183 K)

Figure S2. <sup>13</sup>C{<sup>1</sup>H} NMR spectrum at 183 K.

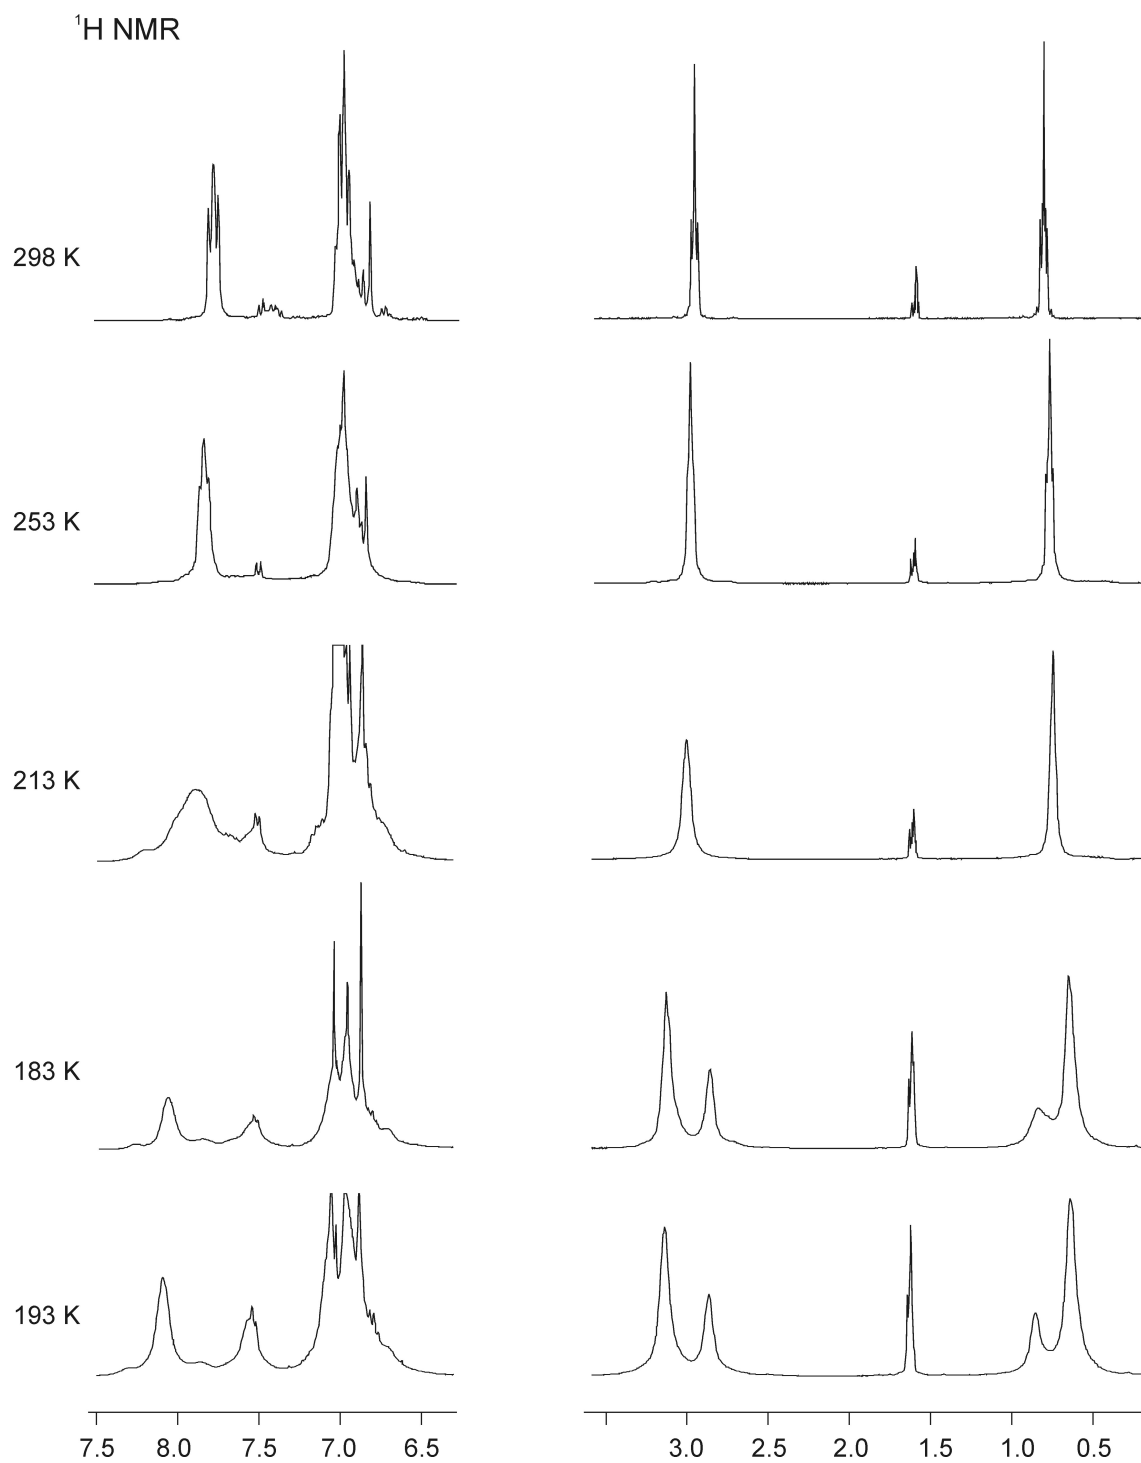

Figure S1. <sup>1</sup>H NMR (300.13 MHz) spectra of a ca. 0.1 M sample of **1** in toluene-*d*<sub>8</sub> as a function of temperature

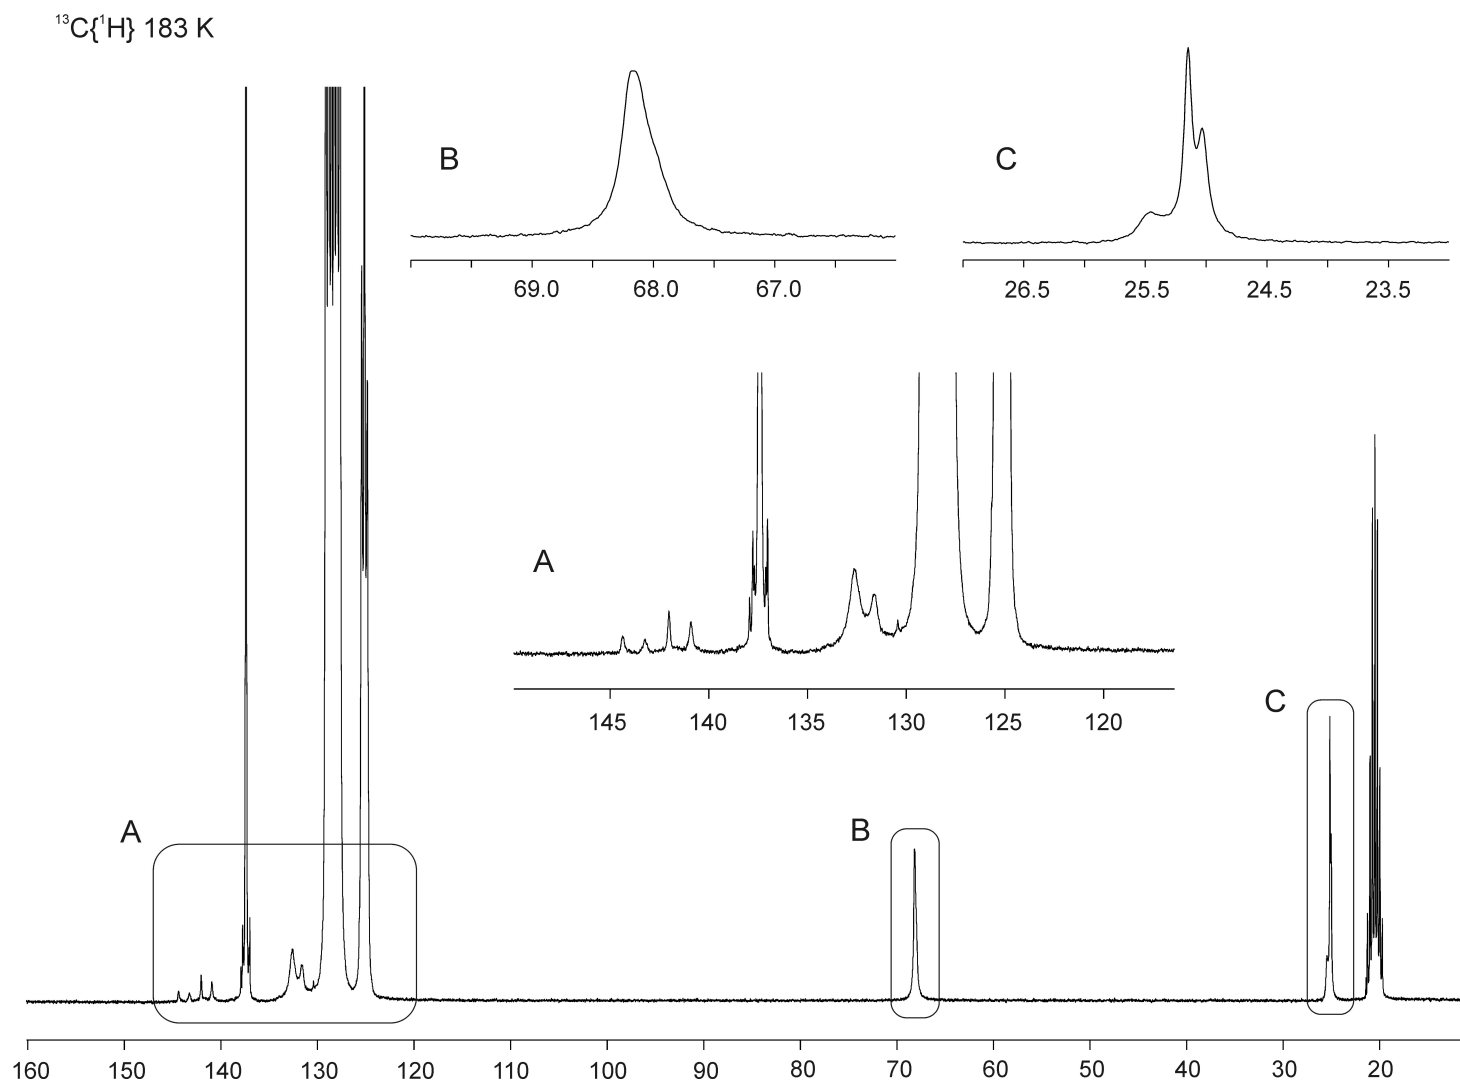

Figure S2.  $^{13}\text{C}$  NMR (75.47 MHz) spectrum of a ca. 0.1 M sample of **1** in  $\text{toluene-}d_8$  at 183 K
